# Supplementary material for: Renal safety evaluation of aspirin plus edaravone in patients with ischaemic stroke: a retrospective cohort study
Source: HighWire-hosted journal article supplement (doi:10.1136/bmjopen-2021-055469), 2022-04-01
Supplement: bmjopen-2021-055469supp001_data_supplement.pdf [file bmjopen-2021-055469supp001_data_supplement.pdf]

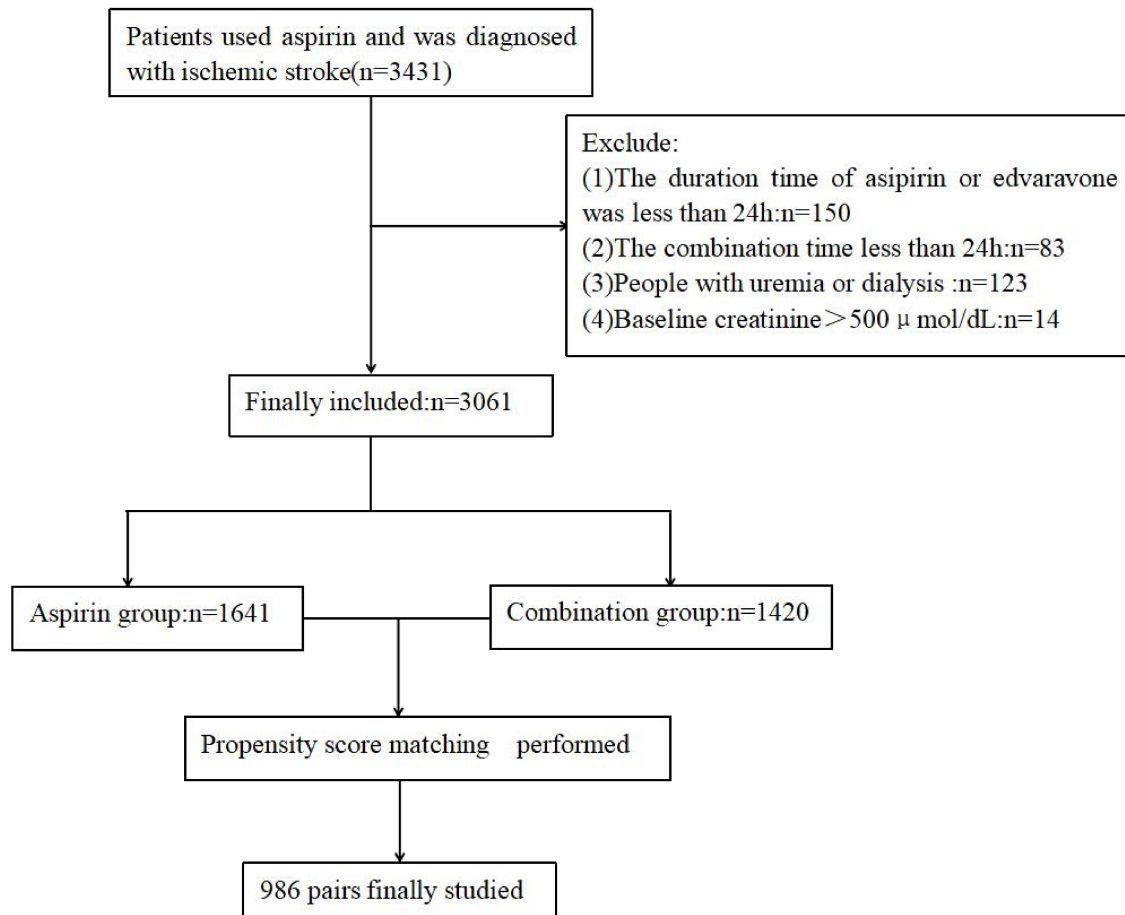

**Figure S1. The screening flow chart**

| Endpoint                 | Aspirin group(n=1641) | Combination group(n=1420) | <i>p</i> |
|--------------------------|-----------------------|---------------------------|----------|
| eGFR decline             | 435(26.51%)           | 242(17.04%)               | <0.001*  |
| eGFR mild decline        | 338(20.60%)           | 178(12.54%)               |          |
| eGFR severe decline      | 97(5.91%)             | 64(4.51%)                 |          |
| AKI(AKIN stage $\geq$ 1) | 159(9.69%)            | 76(5.35%)                 | <0.001*  |
| Stage 1 AKI              | 143(8.71%)            | 55(3.87%)                 |          |
| Stage 2 AKI              | 9(0.55%)              | 11(0.77%)                 |          |
| Stage 3 AKI              | 7(0.43%)              | 10(0.70%)                 |          |

**Table S1. Incidence of AKI and eGFR decline in patients before matching**

\**p* <0.05.

| Variable                     | OR    | Lower 95%CI | Upper 95%CI | <i>p</i> |
|------------------------------|-------|-------------|-------------|----------|
| Sex (male)                   | 1.035 | 0.782       | 1.369       | 0.811    |
| Age (years)                  | 1.021 | 1.008       | 1.034       | 0.001*   |
| Uric acid (μmol/L)           | 1.002 | 1.001       | 1.003       | 0.001*   |
| BUN (mmol/L)                 | 1.147 | 1.116       | 1.179       | 0.000*   |
| Baseline creatinine (μmol/L) | 1.009 | 1.007       | 1.010       | 0.000*   |
| Hematokrit (%)               | 0.923 | 0.903       | 0.942       | 0.000*   |
| Hypertension                 | 1.400 | 0.966       | 2.028       | 0.076    |
| Diabetes                     | 1.761 | 1.348       | 2.300       | 0.000*   |
| Angina                       | 0.696 | 0.424       | 1.142       | 0.151    |
| Myocardial infarction        | 2.255 | 1.601       | 3.177       | 0.000*   |
| Heart failure                | 3.244 | 2.328       | 4.520       | 0.000*   |
| Anemia                       | 2.351 | 1.792       | 3.083       | 0.000*   |
| CKD                          | 3.349 | 2.548       | 4.401       | 0.000*   |
| Contrast agents              | 0.875 | 0.626       | 1.222       | 0.434    |
| Diuretic                     | 4.604 | 3.495       | 6.065       | 0.000*   |
| ACEI                         | 1.071 | 0.775       | 1.480       | 0.677    |
| ARB                          | 1.403 | 1.006       | 1.958       | 0.046*   |
| Calcium antagonists          | 1.402 | 1.074       | 1.831       | 0.013*   |
| β-blocker                    | 1.071 | 0.775       | 1.480       | 0.677    |
| Cephalosporin                | 1.533 | 1.128       | 2.083       | 0.006*   |
| Statins                      | 0.906 | 0.668       | 1.227       | 0.523    |

**Table S2. Univariate logistic regression analysis for risk factors of AKI before matching**

Abbreviations: BUN, blood uric nitrogen; ACEI, angiotensin converting enzyme inhibitor; ARB, angiotensin receptor inhibitor. OR, odds ratio; 95%CI, confidence interval.

\**p* < 0.05.

| Baseline eGFR                                   | AKIN stage     | Aspirin group | Combination group | <i>p</i> |
|-------------------------------------------------|----------------|---------------|-------------------|----------|
| eGFR<30mL/<br>(min1.73 m <sup>2</sup> )         |                | N=63(%)       | N=68(%)           |          |
|                                                 | AKI (Stage ≥1) | 14(22.22%)    | 19(27.94%)        | 0.451    |
|                                                 |                |               |                   | 0.463    |
|                                                 | 0              | 49(77.78%)    | 49(72.06%)        |          |
|                                                 | Stage 1        | 13(20.63%)    | 18(26.47%)        |          |
| 30≤ eGFR<br><60mL/<br>(min1.73 m <sup>2</sup> ) |                | N=264(%)      | N=238(%)          |          |
|                                                 | AKI (Stage ≥1) | 26(9.85%)     | 18(7.56%)         | 0.366    |
|                                                 |                |               |                   | 0.417    |
|                                                 | 0              | 238(90.15%)   | 220(92.44%)       |          |
|                                                 | Stage 1        | 24(9.09%)     | 11(4.62%)         |          |
| 60≤ eGFR<br><90mL/<br>(min1.73 m <sup>2</sup> ) |                | N=391(%)      | N=389(%)          |          |
|                                                 | AKI (Stage ≥1) | 29(7.42%)     | 17(4.37%)         | 0.071    |
|                                                 |                |               |                   | 0.077    |
|                                                 | 0              | 362(92.58%)   | 372(95.63%)       |          |
|                                                 | Stage 1        | 24(6.14%)     | 11(2.83%)         |          |
| 90≤eGFRmL/<br>(min1.73 m <sup>2</sup> )         |                | N=268(%)      | N=291(%)          |          |
|                                                 | AKI (Stage ≥1) | 7(2.61%)      | 8(2.75%)          | 0.920    |
|                                                 |                |               |                   | 0.913    |
|                                                 | 0              | 261(97.39%)   | 283(97.25%)       |          |
|                                                 | Stage 1        | 7(2.61%)      | 8(2.75%)          |          |

---

|         |          |          |
|---------|----------|----------|
| Stage 1 | 4(1.49%) | 4(1.37%) |
| Stage 2 | 3(1.12%) | 2(0.69%) |
| Stage 3 | 0        | 2(0.69%) |

---

**Table S3. Incidence of different stages AKI in different baseline eGFR groups between the two therapies.**

\* $p < 0.05$ .

| Baseline eGFR                        | eGFR decline   | Aspirin group | Combination group | <i>p</i> |
|--------------------------------------|----------------|---------------|-------------------|----------|
| <30mL/ (min1.73 m <sup>2</sup> )     |                | N=63(%)       | N=68(%)           |          |
|                                      | decline        | 15(23.81%)    | 21(30.88%)        | 0.365    |
|                                      | 0              | 48(76.19%)    | 47(69.12%)        | 0.309    |
|                                      | mild decline   | 12(19.05%)    | 14(20.59%)        |          |
| 30≤ eGFR                             |                | N=264(%)      | N=238(%)          |          |
|                                      | decline        | 52(19.70%)    | 30(12.61%)        | 0.032*   |
|                                      | 0              | 212(80.30%)   | 208(87.39%)       | 0.040    |
|                                      | mild decline   | 39(14.77%)    | 19(7.98%)         |          |
| 60≤ eGFR                             |                | N=391(%)      | N=389(%)          |          |
|                                      | decline        | 79(20.20%)    | 40(10.28%)        | 0.000*   |
|                                      | 0              | 312(79.80%)   | 349(89.72%)       | 0.000    |
|                                      | mild decline   | 57(14.58%)    | 26(6.68%)         |          |
| 90≤eGFRmL/ (min1.73 m <sup>2</sup> ) |                | N=268(%)      | N=291(%)          |          |
|                                      | decline        | 98(36.57%)    | 76(26.12%)        | 0.008*   |
|                                      | 0              | 170(63.43%)   | 215(73.88%)       | 0.009    |
|                                      | mild decline   | 82(30.60%)    | 63(21.65%)        |          |
|                                      |                |               |                   |          |
|                                      | severe decline | 16(5.97%)     | 13(4.47%)         |          |
|                                      |                |               |                   |          |

**Table S4. Incidence of eGFR decline in different baseline eGFR groups between the two**

**therapies.**

eGFR decline: eGFR decreased >10% from baseline eGFR; mild decline: decreased 10%-30% from baseline eGFR; severe decline: decreased >30% from baseline eGFR; eGFR didn't decrease or decreased  $\leq$ 10%.

\* $p < 0.05$ .
